# Supplementary material for: Thermal preconditioning of membrane stress to control the shapes of ultrathin crystals
Source: Royal Society of Chemistry journal article supplement (doi:10.1039/d4sm00739e), 2024-01-01
Supplement: d4sm00739e1.pdf [file d4sm00739e1.pdf]

Supporting Information:

### Thermal Preconditioning of Membrane Stress to Control the Shapes of Ultrathin Crystals

Hao Wan,<sup>1</sup> Geunwoong Jeon,<sup>2</sup> Gregory M. Grason,<sup>1</sup> Maria M. Santore<sup>1,\*</sup>

<sup>1</sup>Department of Polymer Science and Engineering  
University of Massachusetts  
120 Governors Drive  
Amherst, MA 01003

<sup>2</sup>Department of Physics  
University of Massachusetts  
710 N Pleasant St  
Amherst, MA 01003

\*corresponding author: santore@mail.pse.umass.edu

#### 1. Distribution of vesicle sizes for different crystal shapes, measured at different cooling rates.

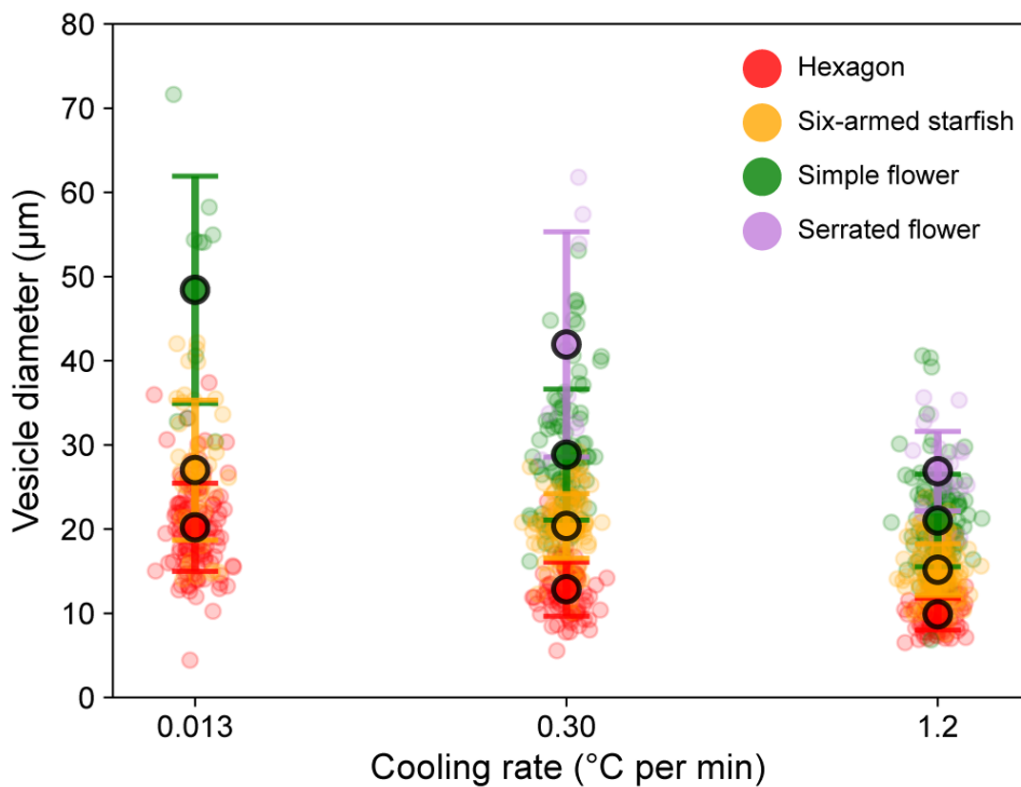

## 2. Summary of Solid Area Fractions

Table SI-1 summarizes the solid area fractions of the solid domains (one solid domain is present in each vesicle.). The solid area fractions were calculated as described in the supporting information of our prior work.<sup>1</sup>

**Table SI-1. Summary of solid area fractions of solid domains produced at different cooling rates.**

|                           | <b>1.2 °C per min</b> | <b>0.30 °C per min</b> | <b>0.013 °C per min</b> |
|---------------------------|-----------------------|------------------------|-------------------------|
| <b>Mean</b>               | 0.127                 | 0.125                  | 0.134                   |
| <b>Standard Deviation</b> | 0.015                 | 0.019                  | 0.025                   |
| <b>Sample Size</b>        | 14                    | 44                     | 12                      |

### 3. Impact of membrane property parameters on tension evolution, from the engineering model.

Below we show the impact of membrane properties on the tension evolution for an hour of cooling at the rate of  $0.3\text{ }^{\circ}\text{C}/\text{min}$ . The findings generally show that despite substantial variations in properties, the small vesicles,  $20\text{ }\mu\text{m}$  in diameter or less, reach a steady state plateau that varies only slightly with the membrane property of interest. Therefore the impact of the membrane property on the plateau level and timing of the plateau would be very difficult to distinguish in experiments with small vesicles. The greatest impact of membrane properties is seen for the largest vesicles, approaching  $60\text{ }\mu\text{m}$  in diameter. Here the rapid rise in tension was sensitive to membrane properties but, because the large tensions approached lysis conditions, burst and reseal dynamics may dominate in for the largest vesicles.

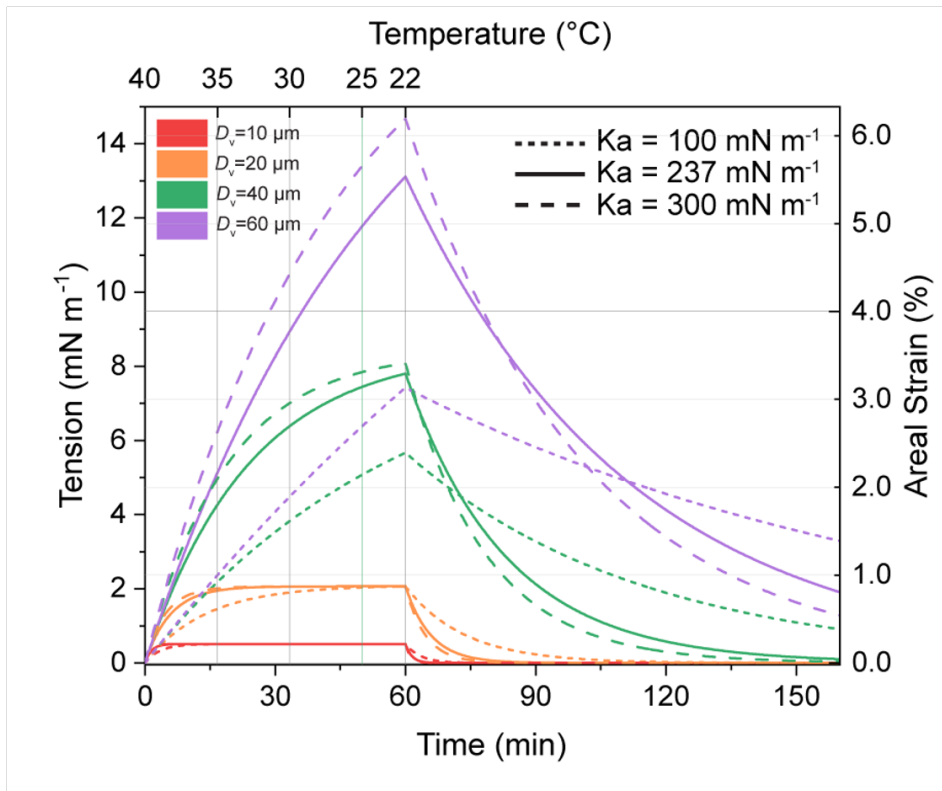

**Figure S-2.** Impact of  $K_a$ , area expansion modulus, on tension evolution during cooling and subsequent temperature hold near room temperature. Each color family represents a vesicle size while the line types show variations in  $K_a$ . Similar to the main paper, the upper axis estimates the temperature history for the case where vesicles become spherical and first develop tension at  $40^{\circ}\text{C}$ .

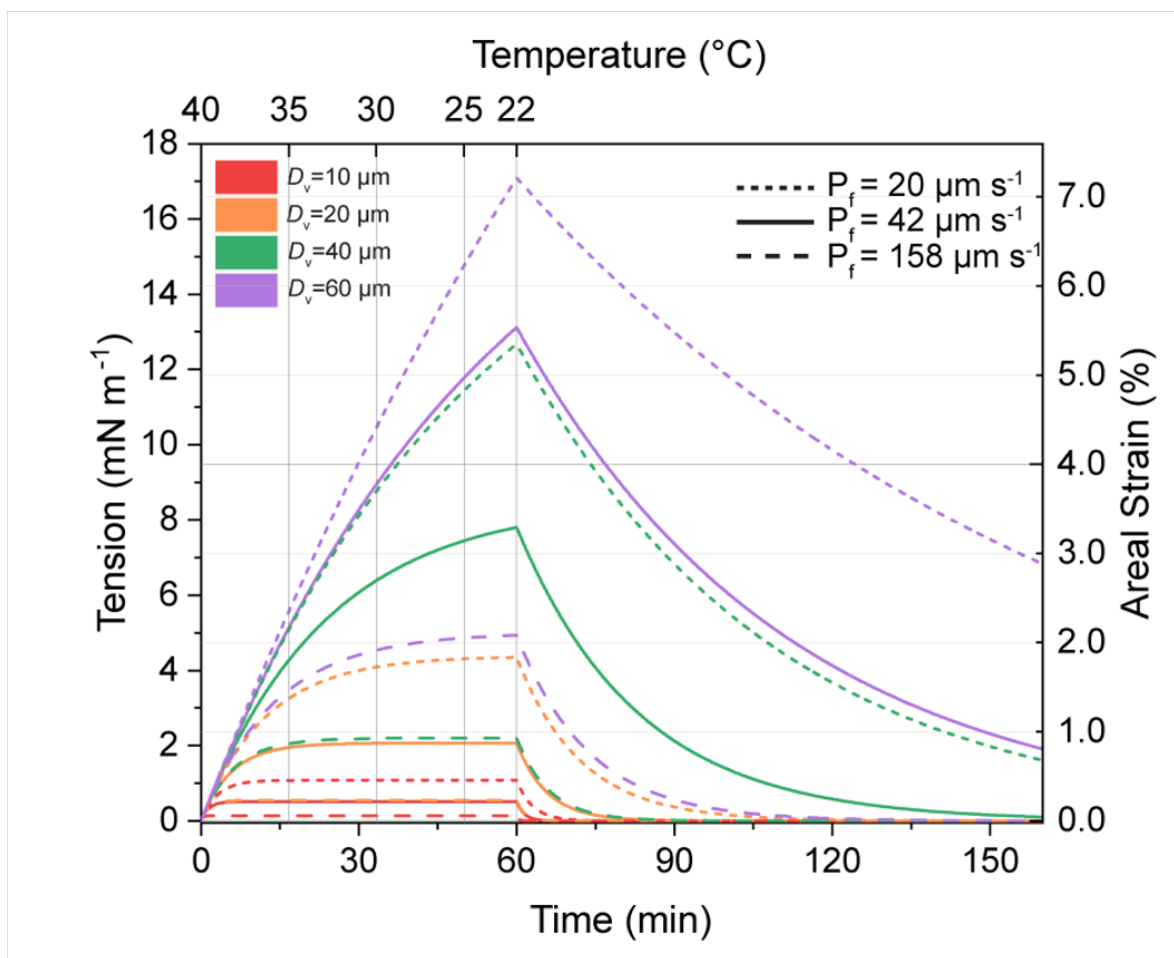

**Figure S-3.** Impact of membrane permeability, on tension evolution during cooling and subsequent temperature hold near room temperature. Each color family represents a vesicle size while the line types show variations in permeability. Similar to the main paper, the upper axis estimates the temperature history for the case where vesicles become spherical and first develop tension at 40°C.

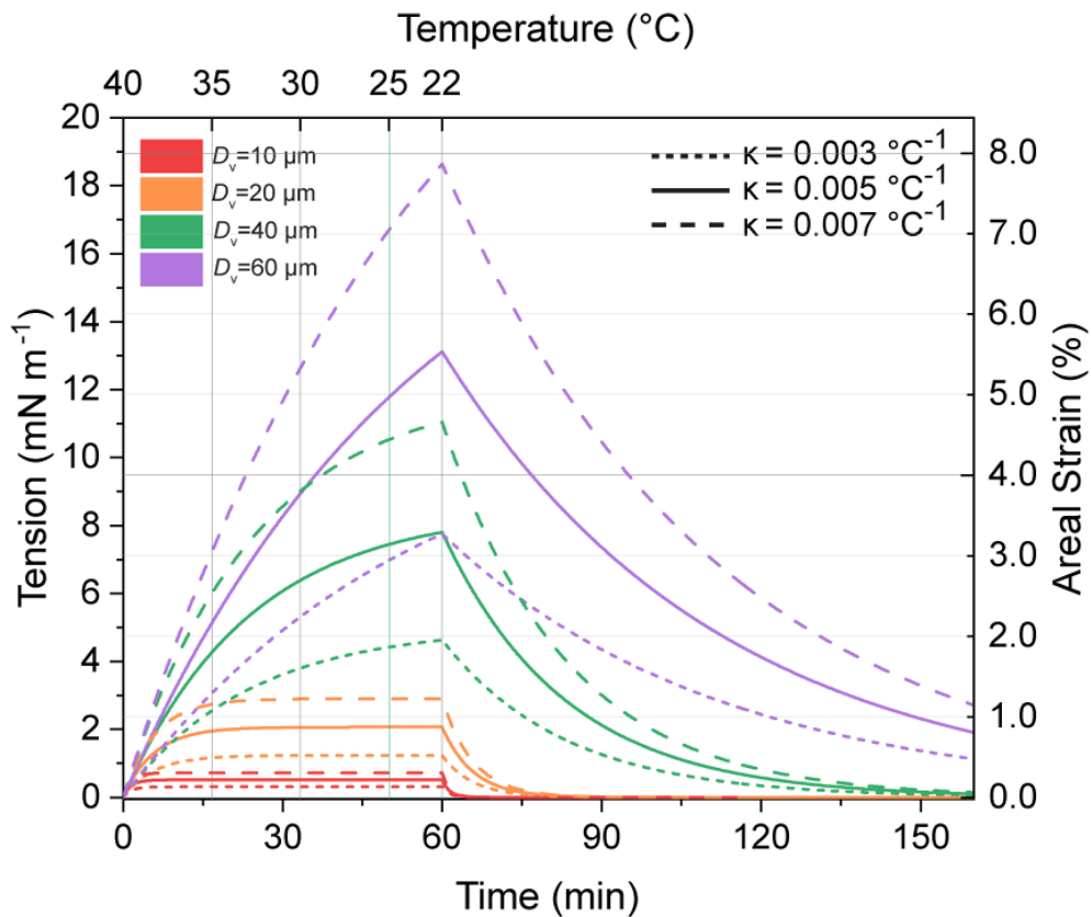

**Figure S-4.** Impact of coefficient of thermal expansion, on tension evolution during cooling and subsequent temperature hold near room temperature. Each color family represents a vesicle size while the line types show variations in coefficient of thermal expansion. Similar to the main paper, the upper axis estimates the temperature history for the case where vesicles become spherical and first develop tension at 40°C.

## References

1. Wan, H., Jeon, G., Xin, W. Y., Grason, G. M. & Santore, M. M. Flower-shaped 2D crystals grown in curved fluid vesicle membranes. *Nature Communications* **15**, 3442 (2024).
